# Supplementary material for: Identification and Characterization of a Novel Species of Genus Akkermansia with Metabolic Health Effects in a Diet-Induced Obesity Mouse Model
Source: MDPI journal article supplement (doi:10.3390/cells11132084), 2022-06-30
Supplement: s1 [file s1]

## Article

# Identification and Characterization of a Novel Species of Genus *Akkermansia* with Metabolic Health Effects in a Diet-Induced Obesity Mouse Model

Ritesh Kumar <sup>1,\*</sup>, Helene Kane <sup>1</sup>, Qiong Wang <sup>1</sup>, Ashley Hibberd <sup>2</sup>, Henrik Max Jensen <sup>3</sup>, Hye-Sook Kim <sup>1</sup>, Steffen Yde Bak <sup>3</sup>, Isabelle Auzanneau <sup>4</sup>, Stéphanie Bry <sup>4</sup>, Niels Christensen <sup>3</sup>, Andrew Friedman <sup>1</sup>, Pia Rasinkangas <sup>5</sup>, Arthur C. Ouwehand <sup>5</sup>, Sofia D. Forssten <sup>5</sup> and Oliver Hasselwander <sup>6</sup>

<sup>1</sup> Health & Biosciences, International Flavors & Fragrances, Inc. (IFF), Wilmington, DE 19803, USA; helene-m.a.kane@iff.com (H.K.); qiong.wang@iff.com (Q.W.); hskim1214@gmail.com (H.-S.K.); andrew.friedman@iff.com (A.F.)

<sup>2</sup> Health & Biosciences, IFF, Saint Louis, MO 63110, USA; ashley.hibberd@iff.com (A.H.)

<sup>3</sup> Health & Biosciences, IFF, 8220 Brabrand, Denmark; henrik.max.jensen@iff.com (H.M.J.); steffen.yde.bak@iff.com (S.Y.B.); niels.christensen@iff.com (N.C.)

<sup>4</sup> Health & Biosciences, IFF, 86270 Dange, France; isabelle.auzanneau@iff.com (I.A.); stephanie.bry@iff.com (S.B.)

<sup>5</sup> Health & Biosciences, IFF, 02460 Kantvik, Finland; pia.rasinkangas@iff.com (P.R.); arthur.ouwehand@iff.com (A.C.O.); sofia.forssten@iff.com (S.D.F.)

<sup>6</sup> Health & Biosciences, IFF, c/o Danisco UK Ltd., Reigate United RH2 9PW, UK; oliver.hasselwander@iff.com

\* Correspondence: ritesh.kumar@iff.com; Tel.: +1-302-379-4738

## Supplementary Information

**Figure S1:** The protein sequences from 235 public *Akkermansia* genomes and DSM 33459 genome were clustered at 95% aa identity. The distance between each pair of genomes was estimated using the percent of clusters not shared between them. The clusters by hierarchical clustering were visualized in a dendrogram and a heatmap. The closer the genomes are, the smaller the distance on the dendrogram.

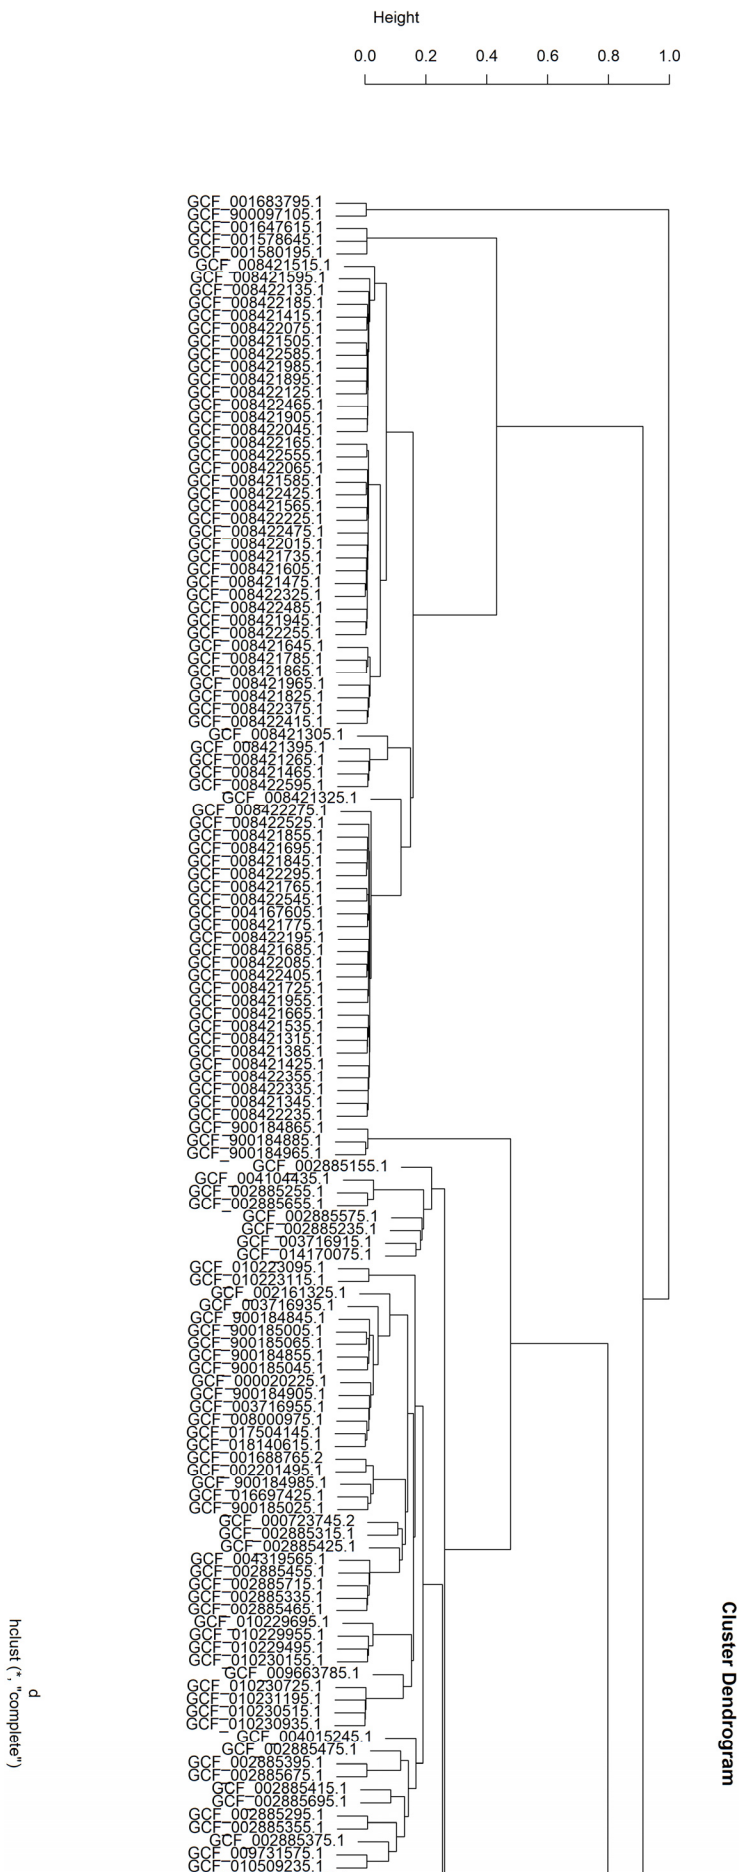

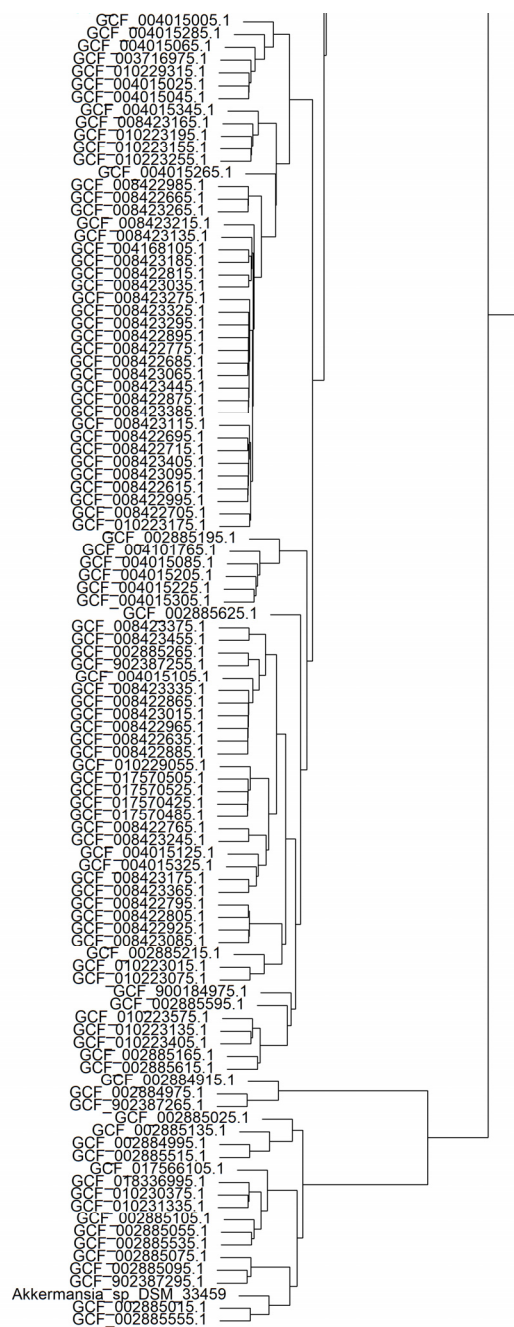

**Table S1.** Susceptibility of the quality control strain *Bacteroides fragilis* DSM 2151 (ATCC 25285) to selected antimicrobials using Brucella broth (standard medium). The MIC Quality Control ranges for anaerobes, specifically for *B. fragilis* DSM 2151 (ATCC 25285), are shown in the right-hand column (CLSI standard M100, 31<sup>st</sup> ed., Table 5E) [68].

| Antimicrobial        | MIC (µg/mL) | <i>B. fragilis</i> DSM 2151 (ATCC 25285) (µg/mL) |
|----------------------|-------------|--------------------------------------------------|
| Ampicillin           | 16          | – <sup>a</sup>                                   |
| Ampicillin-sulbactam | 1/0.5       | 0.5/0.25–2/1                                     |
| Benzylpenicillin     | >8          | – <sup>a</sup>                                   |
| Penicillin           | 8           | 8–32                                             |
| Gentamicin           | >256        | – <sup>a</sup>                                   |
| Kanamycin            | >512        | – <sup>a</sup>                                   |
| Streptomycin         | 512         | – <sup>a</sup>                                   |
| Clindamycin          | 1           | 0.5–2                                            |
| Tetracycline         | ≤0.25       | – <sup>a</sup>                                   |
| Ciprofloxacin        | 2           | – <sup>a</sup>                                   |
| Colistin             | >8          | – <sup>a</sup>                                   |
| Fosfomycin*          | >128        | – <sup>a</sup>                                   |
| Vancomycin           | 64          | – <sup>a</sup>                                   |
| Erythromycin         | 4           | – <sup>a</sup>                                   |
| Chloramphenicol      | 4           | 4–16                                             |
| Imipenem             | 0.12        | 0.03–0.25                                        |
| Meropenem            | 0.06        | 0.03–0.25                                        |
| Metronidazole        | 0.5         | 0.25–2                                           |
| Trimethoprim         | 8           | – <sup>a</sup>                                   |

<sup>a</sup> No MIC values for ampicillin, benzylpenicillin, gentamicin, kanamycin, streptomycin, tetracycline, ciprofloxacin, colistin, fosfomycin vancomycin, erythromycin or trimethoprim are available against the quality control strain *Bacteroides fragilis* DSM2151 (ATCC 25285).

\*Reinforced medium for Clostridia agar were used

**Table S2.** Susceptibility of the quality control strain *Bacteroides fragilis* DSM 2151 (ATCC 25285) to selected antimicrobials using YCFAC broth (growth medium for *Akkermansia* sp. DSM 33459). The MIC Quality Control ranges for anaerobes, specifically for *B. fragilis* DSM 2151 (ATCC 25285), are shown in the right-hand column (CLSI standard M100, 31<sup>st</sup> ed., Table 5E) [68].

| Antimicrobial        | MIC (µg/mL) | <i>B. fragilis</i> DSM 2151 (ATCC 25285) (µg/mL) |
|----------------------|-------------|--------------------------------------------------|
| Ampicillin           | >32         | ~a                                               |
| Ampicillin-sulbactam | 2/1         | 0.5/0.25-2/1                                     |
| Benzylpenicillin     | >8          | ~a                                               |
| Penicillin           | >16         | 8-32                                             |
| Gentamicin           | >256        | ~a                                               |
| Kanamycin            | >512        | ~a                                               |
| Streptomycin         | >512        | ~a                                               |
| Clindamycin          | 0.5         | 0.5-2                                            |
| Tetracycline         | 0.5         | ~a                                               |
| Ciprofloxacin        | 4           | ~a                                               |
| Colistin             | >8          | ~a                                               |
| Fosfomycin*          | >128        | ~a                                               |
| Vancomycin           | 64          | ~a                                               |
| Erythromycin         | 4           | ~a                                               |
| Chloramphenicol      | 4           | 4-16                                             |
| Imipenem             | >32         | 0.03-0.25                                        |
| Meropenem            | >32         | 0.03-0.25                                        |
| Metronidazole        | 2           | 0.25-2                                           |
| Trimethoprim         | >64         | ~a                                               |

<sup>a</sup> No MIC values for ampicillin, benzylpenicillin, gentamicin, kanamycin, streptomycin, tetracycline, ciprofloxacin, colistin, fosfomycin vancomycin, erythromycin or trimethoprim are available against the quality control strain *Bacteroides fragilis* DSM2151 (ATCC 25285).

\*Reinforced medium for Clostridia agar were used

**Table S3:** Genome comparison between *Akkermansia* sp. DSM 33459 and *A. muciniphila* ATCC BAA-835 or the presence of Corrin ring biosynthesis gene cluster.

| Gene         | <i>Akkermansia</i> sp.<br>DSM 33459 | <i>A. muciniphila</i><br>ATCC BAA-835 | ECnumber  | product                                           |
|--------------|-------------------------------------|---------------------------------------|-----------|---------------------------------------------------|
| <b>cbiA</b>  | 1                                   | 0                                     | 6.3.5.11  | Cobyrrinate a,c-diamide synthase                  |
| <b>cbiC</b>  | 1                                   | 0                                     | 5.4.99.60 | Cobalt-precorrin-8 methylmutase                   |
| <b>cbiD</b>  | 1                                   | 0                                     | 2.1.1.195 | Cobalt-precorrin-5B C(1)-methyltransferase        |
| <b>cbiET</b> | 1                                   | 0                                     | unknownEC | Cobalamin biosynthesis bifunctional protein CbiET |
| <b>cbiF</b>  | 1                                   | 0                                     | 2.1.1.271 | Cobalt-precorrin-4 C(11)-methyltransferase        |
| <b>cbiKp</b> | 1                                   | 0                                     | 4.99.1.3  | Sirohydrochlorin cobaltochelataase CbiKP          |
| <b>cbiL</b>  | 1                                   | 0                                     | 2.1.1.151 | Cobalt-precorrin-2 C(20)-methyltransferase        |
| <b>chiA1</b> | 1                                   | 0                                     | 3.2.1.14  | Chitinase A1                                      |
| <b>cobO</b>  | 1                                   | 0                                     | 2.5.1.17  | Cob(I)yrinic acid a,c-diamide adenosyltransferase |

**Table S4:** Global Liver proteomics analysis: Significant proteins are distinctly regulated in DIO mice in Akk<sup>Gly</sup> and Liraglutide groups.

|                                                         | Gene     | AkkGly* | Liraglutide* | AkkGly/Vehicle# | Liraglutide/Vehicle# |
|---------------------------------------------------------|----------|---------|--------------|-----------------|----------------------|
| Peroxisomal proteins                                    |          |         |              |                 |                      |
| Peroxisomal bifunctional enzyme                         | Ehhadh   | -2.29   | -4.89        | 1.17            | 1.35                 |
| Peroxisomal coenzyme A diphosphatase NUDT7              | Nudt7    | -2.43   | -3.39        | 1.26            | 1.29                 |
| Peroxisomal membrane protein 4                          | Pxmp4    | 0.49    | -3.38        | 0.86            | 1.98                 |
| Peroxisome assembly factor 2                            | Pex6     | -3.56   | -3.34        | 1.67            | 1.57                 |
| 3-ketoacyl-CoA thiolase A, peroxisomal                  | Acaa1a   | -0.87   | -3.34        | 1.06            | 1.35                 |
| Peroxisomal targeting signal 1 receptor                 | Pex5     | -2.3    | -3.29        | 1.21            | 1.36                 |
| Peroxisomal carnitine O-octanoyltransferase             | Crot     | -0.2    | -2.9         | 0.94            | 1.32                 |
| Glutathione peroxidase 1                                | Gpx1     | 0.1     | -2.9         | 1.06            | 1.26                 |
| Peroxisomal membrane protein 2                          | Pxmp2    | -2.62   | -2.54        | 1.19            | 1.20                 |
| Copper chaperone for superoxide dismutase               | Ccs      | -0.55   | -2.52        | 1.03            | 1.23                 |
| Peroxisomal membrane protein 11A                        | Pex11a   | -2.19   | -1.95        | 1.20            | 1.15                 |
| Peroxisomal protein 5, mitochondrial                    | Prdx5    | -2.45   | -0.8         | 1.15            | 1.07                 |
| Peroxisomal membrane protein PEX14                      | Pex14    | -0.28   | 2.00         | 0.97            | 0.71                 |
| Peroxisomal multifunctional enzyme type 2               | Hsd17b4  | 0.33    | 2.12         | 0.96            | 0.85                 |
| 3-ketoacyl-CoA thiolase B, peroxisomal                  | Acaa1b   | 1.91    | 2.12         | 0.81            | 0.72                 |
| Peroxisomal sarcosine oxidase                           | Pipox    | 1.22    | 2.45         | 0.97            | 0.92                 |
| Glutathione peroxidase 3                                | Gpx3     | 0.51    | 2.61         | 0.96            | 0.73                 |
| Peroxisomal trans-2-enoyl-CoA reductase                 | Pecr     | -0.48   | 2.74         | 1.02            | 0.88                 |
| Peroxisomal protein 2                                   | Prdx2    | -0.38   | 2.74         | 1.01            | 0.88                 |
| Peroxisomal 2,4-dienoyl-CoA reductase                   | Decr2    | 0.50    | 3.02         | 0.82            | 0.66                 |
| Thioredoxin-dependent peroxide reductase, mitochondrial | Prdx3    | -0.04   | 3.22         | 0.98            | 0.75                 |
| Peroxisomal acyl-coenzyme A oxidase 1                   | Acox1    | 1.90    | 3.64         | 0.85            | 0.75                 |
| Peroxisomal membrane protein PEX16                      | Pex16    | 1.41    | 3.66         | 0.92            | 0.79                 |
| Peroxisomal biogenesis factor 19                        | Pex19    | 3.18    | 3.77         | 0.48            | 0.14                 |
| Peroxisomal membrane protein PMP34                      | Slc25a17 | 1.61    | 3.86         | 0.85            | 0.56                 |
| Peroxisome biogenesis factor 1                          | Pex1     | -1.64   | 3.91         | 1.03            | 0.87                 |
| Peroxisomal biogenesis factor 3                         | Pex3     | 1.15    | 6.12         | 0.89            | 0.58                 |
| Peroxisomal membrane protein PEX13                      | Pex13    | 0.72    | 6.28         | 0.77            | 0.14                 |
| Peroxisomal membrane protein 11C                        | Pex11g   | 1.12    | 7.95         | 0.95            | 0.66                 |
|                                                         |          |         | *Z-scores    |                 | #Fold                |
